# Supplementary material
Source: ML conference proceedings conference paper supplement (https://openreview.net/forum?id=m2Ca5jUFqB)
Supplement: supplementary_material [file attachment]

## A. Methods

### A.1. Derivation of the Gradient

**Proof that the gradient of (4) is proportional to (5)** Per construction, we can write  $\mathbf{D}_\theta(\mathbf{x}, t) = \mathbf{x} + t^2 \nabla_{\mathbf{x}} \log p_{\theta,t}(\mathbf{x})$  (Karras et al., 2022). So the gradient can be written as

$$\mathbb{E}_{\substack{\mathbf{R} \sim \text{SO}(3) \\ \boldsymbol{\epsilon} \sim \mathcal{N}(\mathbf{0}, \mathbf{I})}} \left[ \left( \frac{\partial \mathbf{f}(\mathbf{V}, \mathbf{R})}{\partial \mathbf{V}} \right)^\top (\mathbf{f}(\mathbf{V}, \mathbf{R}) - \mathbf{D}_\theta(\mathbf{f}(\mathbf{V}, \mathbf{R}) + t\boldsymbol{\epsilon}, t)) \right] \quad (6)$$

$$= - \mathbb{E}_{\substack{\mathbf{R} \sim \text{SO}(3) \\ \boldsymbol{\epsilon} \sim \mathcal{N}(\mathbf{0}, \mathbf{I})}} \left[ \left( \frac{\partial \mathbf{f}(\mathbf{V}, \mathbf{R})}{\partial \mathbf{V}} \right)^\top (t^2 \nabla \log p_{\theta,t}(\mathbf{f}(\mathbf{V}, \mathbf{R}) + t\boldsymbol{\epsilon}) + t\boldsymbol{\epsilon}) \right] \quad (7)$$

$$= -\nabla_{\mathbf{V}} \mathbb{E}_{\substack{\mathbf{R} \sim \text{SO}(3) \\ \boldsymbol{\epsilon} \sim \mathcal{N}(\mathbf{0}, \mathbf{I})}} [t^2 \log p_{\theta,t}(\mathbf{f}(\mathbf{V}, \mathbf{R}) + t\boldsymbol{\epsilon}) + t\boldsymbol{\epsilon}^\top \mathbf{f}(\mathbf{V}, \mathbf{R})] \quad (8)$$

$$= -\nabla_{\mathbf{V}} \left( \underbrace{\mathbb{E}_{\substack{\mathbf{R} \sim \text{SO}(3) \\ \boldsymbol{\epsilon} \sim \mathcal{N}(\mathbf{0}, \mathbf{I})}} [t^2 \log p_{\theta,t}(\mathbf{f}(\mathbf{V}, \mathbf{R}) + t\boldsymbol{\epsilon})]}_{\text{const. in } \mathbf{V}} + t \underbrace{\mathbb{E}_{\substack{\mathbf{R} \sim \text{SO}(3) \\ \boldsymbol{\epsilon} \sim \mathcal{N}(\mathbf{0}, \mathbf{I})}} [\boldsymbol{\epsilon}^\top \mathbf{f}(\mathbf{V}, \mathbf{R})]}_0 \right) \quad (9)$$

$$= -t^2 \nabla_{\mathbf{V}} \mathbb{E}_{\substack{\mathbf{R} \sim \text{SO}(3) \\ \boldsymbol{\epsilon} \sim \mathcal{N}(\mathbf{0}, \mathbf{I})}} [\log p_{\theta,t}(\mathbf{f}(\mathbf{V}, \mathbf{R}) + t\boldsymbol{\epsilon})] \quad (10)$$

$$= -t^2 \nabla_{\mathbf{V}} \int \int_{\text{SO}(3) \times \mathbb{R}^d} \mathcal{N}(\boldsymbol{\epsilon}; \mathbf{0}, \mathbf{I}) \log p_{\theta,t}(\mathbf{f}(\mathbf{V}, \mathbf{R}) + t\boldsymbol{\epsilon}) d\boldsymbol{\epsilon} d\mathbf{R} \quad (11)$$

$$= -t^2 \nabla_{\mathbf{V}} \int \int_{\text{SO}(3) \times \mathbb{R}^d} \mathcal{N}(\mathbf{x}; \mathbf{f}(\mathbf{V}, \mathbf{R}), t^2 \mathbf{I}) \log p_{\theta,t}(\mathbf{x}) d\mathbf{x} d\mathbf{R} \quad (12)$$

$$= t^2 \nabla_{\mathbf{V}} \left( \overbrace{\int \int_{\text{SO}(3) \times \mathbb{R}^d} \mathcal{N}(\mathbf{x}; \mathbf{f}(\mathbf{V}, \mathbf{R}), t^2 \mathbf{I}) \log \mathcal{N}(\mathbf{x}; \mathbf{f}(\mathbf{V}, \mathbf{R}), t^2 \mathbf{I}) d\mathbf{x} d\mathbf{R}}^{\text{const. in } \mathbf{V}} - \int \int_{\text{SO}(3) \times \mathbb{R}^d} \mathcal{N}(\mathbf{x}; \mathbf{f}(\mathbf{V}, \mathbf{R}), t^2 \mathbf{I}) \log p_{\theta,t}(\mathbf{x}) d\mathbf{x} d\mathbf{R} \right) \quad (13)$$

$$= t^2 \nabla_{\mathbf{V}} \int_{\text{SO}(3)} \text{D}_{\text{KL}}(\mathcal{N}(\mathbf{f}(\mathbf{V}, \mathbf{R}), t^2) \parallel p_{\theta,t}) d\mathbf{R} \quad (14)$$

In this derivation, we used the following transformations:

1. Eq. (6)  $\rightarrow$  Eq. (7): We plug in the definition of the denoiser:  $\mathbf{D}_\theta(\mathbf{x}, t) = \mathbf{x} + t^2 \nabla_{\mathbf{x}} \log p_{\theta,t}(\mathbf{x})$ .
2. Eq. (7)  $\rightarrow$  Eq. (8): We swap the gradient and the expectation, which are both linear operations. Moreover, we use the identities

$$\nabla_{\mathbf{V}} \log p_{\theta,t}(\mathbf{f}(\mathbf{V}, \mathbf{R}) + t\boldsymbol{\epsilon}) = \left( \frac{\partial \mathbf{f}(\mathbf{V}, \mathbf{R})}{\partial \mathbf{V}} \right)^\top \nabla \log p_{\theta,t}(\mathbf{f}(\mathbf{V}, \mathbf{R}) + t\boldsymbol{\epsilon}), \quad \nabla_{\mathbf{V}} \boldsymbol{\epsilon}^\top \mathbf{f}(\mathbf{V}, \mathbf{R}) = \left( \frac{\partial \mathbf{f}(\mathbf{V}, \mathbf{R})}{\partial \mathbf{V}} \right)^\top \boldsymbol{\epsilon}$$

where  $\partial \mathbf{f} / \partial \mathbf{V}$  is the partial Jacobian matrix of the forward operator (Jacobian with respect to  $\mathbf{V}$ ).

3. Eq. (8)  $\rightarrow$  Eq. (9): Linearity of expectation.
4. Eq. (9)  $\rightarrow$  Eq. (10): Linearity of expectation.
5. Eq. (10)  $\rightarrow$  Eq. (11): Definition of the expectation.
6. Eq. (11)  $\rightarrow$  Eq. (12): Substitution  $\boldsymbol{\epsilon} \rightarrow \mathbf{x} = \mathbf{f}(\mathbf{V}, \mathbf{R}) + t\boldsymbol{\epsilon}$  such that  $\boldsymbol{\epsilon} = (\mathbf{x} - \mathbf{f}(\mathbf{V}, \mathbf{R})) / t$ ,  $d\boldsymbol{\epsilon} \rightarrow t^{-d} d\mathbf{x}$  and

$$\mathcal{N}(\boldsymbol{\epsilon}; \mathbf{0}, \mathbf{I}) = \frac{1}{(2\pi)^{d/2}} e^{-\|\boldsymbol{\epsilon}\|^2/2} \rightarrow \frac{1}{(2\pi)^{d/2}} e^{-\|\mathbf{x} - \mathbf{f}(\mathbf{V}, \mathbf{R})\|^2/2t^2} = t^d \mathcal{N}(\mathbf{x}; \mathbf{f}(\mathbf{V}, \mathbf{R}), t^2 \mathbf{I})$$

where  $d$  is the dimension of image space (number of pixels).

7. Eq. (12)  $\rightarrow$  Eq. (13): Introduction of a constant in  $\mathbf{V}$  (negative information entropy of a Gaussian averaged over uniformly distributed rotations):

$$\iint_{\text{SO}(3) \times \mathbb{R}^d} \mathcal{N}(\mathbf{x}; \mathbf{f}(\mathbf{V}, \mathbf{R}), t^2 \mathbf{I}) \log \mathcal{N}(\mathbf{x}; \mathbf{f}(\mathbf{V}, \mathbf{R}), t^2 \mathbf{I}) \, d\mathbf{x} \, d\mathbf{R} = -\frac{d}{2} (\log(2\pi t^2) + 1)$$

8. Eq. (13)  $\rightarrow$  Eq. (14): Definition of the KL divergence.

## A.2. Implementation Details

Code 1. Python implementation of the forward model.

```

import torch
import torch.nn.functional as F

def forward_project(V, R):
    """
    Input:
        - V: shape (N, N, N)
        - R: shape (M, 3, 3)
    Returns:
        - projections: shape (M, N, N)
    """
    M = R.shape[0]
    N = volume.shape[-1]
    V_exp = V.reshape(1, 1, N, N, N).expand(M, -1, -1, -1, -1)
    orientation = torch.zeros((M, 3, 4), device=V.device)
    orientation[:, :3, :3] = R
    grid = F.affine_grid(orientation, V_exp.size(), align_corners=True)
    V_exp_rotated = F.grid_sample(V_exp,
                                  grid,
                                  align_corners=True)
    projections = V_exp_rotated.sum(dim=-3).squeeze(1)
    return projections

```

Code 2. Python implementation of the back projection.

```

import torch
import torch.nn.functional as F

def back_project(residual, R):
    """
    Input:
        - residual: shape (M, N, N)
        - R: shape (M, 3, 3)
    Returns:
        - V: shape (N, N, N)
    """
    M = residual.shape[0]
    N = residual.shape[-1]
    V_exp_rotated = residual.view(M, 1, N, N).unsqueeze(-3).expand(M, 1, N, N, N)
    orientation = torch.zeros((M, 3, 4), device=R.device)
    orientation[:, :3, :3] = R.transpose(1, 2)
    grid = F.affine_grid(orientation, V_exp_rotated.size(), align_corners=True)
    V_exp = F.grid_sample(V_exp_rotated,
                          grid,
                          align_corners=True)
    V = V_exp.sum(dim=0, keepdim=True).reshape(N, N, N) / (N * M)
    return V

```

Code 3. Python implementation of Algorithm 1.

```

660
661 import torch
662
663 @torch.no_grad()
664 def reconstruction(denoiser, base_image, M = lambda step: 2, t = 0.3, S = 1000, lr = 1,
665                  t_min = 0.002):
666     """
667     Input:
668     - denoiser: diffusers.UNet2DModel
669     - base_image: (N, N)
670     Returns:
671     - V: (N,N,N)
672     """
673     # initial volume
674     device = base_image.device
675     size = base_image.shape[-1]
676     min_voxel_val = base_image.min() / size
677     V = torch.zeros((1,1, size, size, size), device=device)
678
679     # spherical mask
680     mask = create_sphere(size).unsqueeze(0).unsqueeze(0).to(device)
681
682     for step in range(S):
683
684         # 1) forward projection
685         rotations = sample_rotations(M(step), device=device, first_ident=w(step) > 0)
686         x = forward_project(V, rotations)
687
688         # 2) compute residual
689         x_in = x[1:]
690         noise = torch.randn_like(x_in)
691         xt = x_in + (t**2 - t_min**2).sqrt() * noise
692         x0 = denoiser(xt.unsqueeze(1), t).squeeze(1)
693         x0 = torch.cat((base_image.unsqueeze(0), x0), dim=0)
694         r = x - x0
695
696         # 3) back project residual
697         delta = back_project(r, rotations)
698
699         # 4) take gradient step
700         V = V - lr * delta
701
702         # 5) enforce support
703         V = V * mask
704         V[V < min_voxel_val] = min_voxel_val
705
706     return V.squeeze()

```

## B. Experiments

### B.1. Ours

In generating the results presented in this work with Algorithm 1, we deliberately avoided using overly complex schedules or heuristics. Consequently, we kept both the mollification degree  $t$  and the learning rate  $\alpha$  fixed throughout the reconstruction. The only parameter that depends on the iteration step is the batch size  $M$  (i.e., the number of projection images processed per iteration). We observed that starting with a small batch size helps to rapidly improve the initial volume while reducing the risk of becoming trapped in local minima.

In the heterogeneous setting, choosing  $M = 2$  also provides a straightforward way to ensure a strong influence of the base image; its relative contribution is higher for small  $M$  and diminishes as  $M$  increases. In contrast, for the homogeneous case, we increased  $M$  linearly from 2 to 50 so that the impact of the base image gradually decreases. This prevents the features of the base image from dominating those introduced by the denoiser. Such a balance is particularly crucial for real data, where

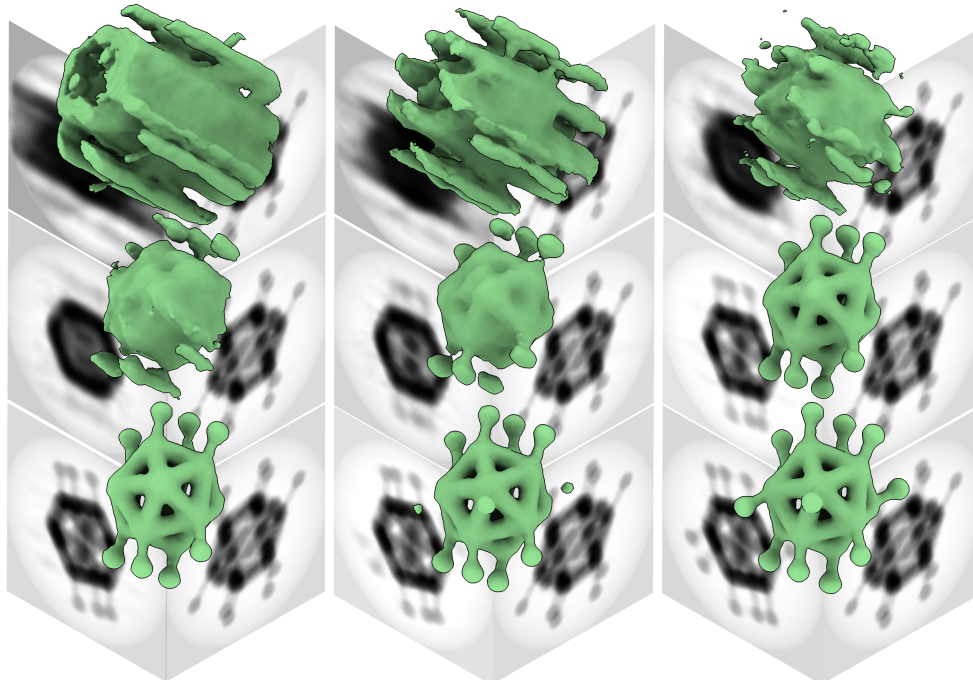

Figure 8. From top left to bottom right, our method is illustrated as it incrementally refines the initial volume until the final reconstruction is reached. The volumes shown correspond to iterations 10, 20, 40, . . . , 2560. For the base image, the first projection of the dataset was used in this reconstruction.

each projection may contain artifacts. Even in the homogeneous case, the base image remains crucial for stabilizing the reconstruction: without it, the optimization may get stuck in local minima or lead to a rotation of the volume, both of which negatively affect reconstruction quality. For both the reconstruction with Algorithm 1 and the training of the denoiser, we used a large number of iterations to ensure that the denoiser and the volume reconstruction had sufficient opportunities to converge. More details on the parameters used during reconstruction and training are provided in Table 2.

## B.2. CryoDRGN2

We observed that the default CryoDRGN2 training settings are not well-suited for small datasets of about 30–300 images. To address this, we artificially increased the dataset size to roughly 6000 images by repeatedly duplicating the existing images. This simple strategy led to substantially improved results. In addition, we normalized the dataset prior to running CryoDRGN2. We also modified a minor part of the code in the `compute_ctf()` function within `ctf.py`, changing the return statement from `return ctf` to `return torch.ones_like(ctf)`. As a consequence, the CTF operation in CryoDRGN2’s forward model effectively became an identity mapping. We continued to supply CTF parameter files `ctf.pkl` for each image as input, but these now serve only as dummy values. We experimented with a range of parameter settings for each dataset and, in some cases, obtained better performance by adjusting the default values of `--lr` and `--feat-sigma`. We also chose a large number of epochs to ensure that CryoDRGN2’s training has sufficient time to converge. Nonetheless, in most experiments we primarily retained the default parameters.

## Score-based Random Tomography of Dynamic Structures

Table 1. Properties of the test dataset used as input for the reconstruction algorithms.

|                 | NUMBER OF IMAGES | IMAGE SIZE | DYNAMICS      | SYMMETRY                                             |
|-----------------|------------------|------------|---------------|------------------------------------------------------|
| BOX-MODEL       | 300              | 88 × 88    | HETEROGENEOUS | ASYMMETRIC WITH<br>D <sub>4h</sub> SYMMETRIC<br>CORE |
| CAPSID-MODEL    | 200              | 88 × 88    | HETEROGENEOUS | ASYMMETRIC WITH<br>ICOSAHEDRAL CORE                  |
| 80S RIBOSOME    | 100              | 136 × 136  | HOMOGENEOUS   | ASYMMETRIC                                           |
| β-GALACTOSIDASE | 34               | 64 × 64    | HOMOGENEOUS   | D <sub>2</sub> DIHEDRAL SYMMETRY                     |

Table 2. Parameter we used for the reconstructions per dataset.

|                                      | BOX-MODEL   | CAPSID-MODEL | 80S RIBOSOME                      | β-GALACTOSIDASE                   |
|--------------------------------------|-------------|--------------|-----------------------------------|-----------------------------------|
| <b>RECONSTRUCTION</b>                |             |              |                                   |                                   |
| <i>M</i> (RECONSTRUCTION BATCH SIZE) | 2           | 2            | LINEAR INCREASING<br>FROM 2 TO 50 | LINEAR INCREASING<br>FROM 2 TO 50 |
| <i>t</i> (MOLLIFICATION DEGREE)      | 0.2         | 0.5          | 0.3                               | 0.3                               |
| LEARNING RATE $\alpha$               | 1           | 1            | 1                                 | 0.5                               |
| NUM. ITERATIONS ( <i>S</i> )         | 10K         | 10K          | 5K                                | 5K                                |
| RUNTIME                              | 2-3 MIN     | 2-3 MIN      | 2-3 MIN                           | 2-3 MIN                           |
| <b>TRAINING</b>                      |             |              |                                   |                                   |
| STEPS                                | 80K         | 75K          | 500K                              | 300K                              |
| LEARNING RATE                        | 0.0008      | 0.0007       | 0.0002                            | 0.0002                            |
| BATCH SIZE                           | 512         | 512          | 128                               | 128                               |
| DEVICE                               | NVIDIA A100 | NVIDIA A100  | NVIDIA A100                       | NVIDIA A100                       |
| RUNTIME                              | ≈12H        | ≈11H         | ≈12H                              | ≈24H                              |

**Box** cryodrgn abinit\_het box\_extended\_normed.mrcs --ctf ctf.pkl --uninvert-data --lr 0.0005 -n 300 --checkpoint 100 --zdim 8 --window-r 0.99 --feat-sigma 0.1 -o output\_box

**Capsid** cryodrgn abinit\_het capsid\_extended\_normed.mrcs --ctf ctf.pkl --uninvert-data --lr 0.0005 -n 300 --checkpoint 100 --zdim 8 --window-r 0.99 --feat-sigma 0.1 -o output\_capsid

**Betagalac** cryodrgn abinit\_homo betagalac\_extended\_normed.mrcs --ctf ctf.pkl -n 300 --checkpoint 100 --uninvert-data -o output\_betagalac

**Ribosome** cryodrgn abinit\_homo ribosome\_crop\_extended\_normed.mrcs --ctf ctf.pkl -n 300 --checkpoint 100 --feat-sigma 0.25 --uninvert-data --window-r 0.99 -o output\_ribosome

### B.3. SIMPLE

Within the SIMPLE3 GUI, we employed `import_cavgs` and `initial_3Dmodel` to generate the 3D reconstructions.

### B.4. EMAN

For each dataset, we ran the following command to generate 10 candidate reconstructions and then chose the one with the best score: `e2initialmodel.py --input=[dataset-name].mrcs --iter=8 --tries=10 --sym=c1 --automaskexpand=-1 --parallel=thread:5 --verbose=9`

825  
826  
827  
828  
829  
830  
831  
832  
833  
834  
835  
836  
837  
838  
839  
840  
841  
842  
843  
844  
845  
846  
847  
848  
849  
850  
851  
852  
853  
854  
855  
856  
857  
858  
859  
860  
861  
862  
863  
864  
865  
866  
867  
868  
869  
870  
871  
872  
873  
874  
875  
876  
877  
878  
879

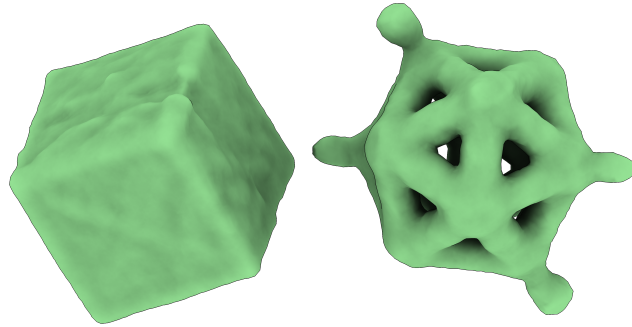

*Figure 9.* Representative failure cases of our method that occur with low frequency. On the **left**, we display the reconstruction generated by the denoiser trained on the box-model dataset, using the 66th image as the base. On the **right**, we show the reconstruction obtained from the denoiser trained on the capsid-model, with the 103rd dataset image serving as the base. In both cases, the central core is largely recovered, while the movable box lids and, in the capsid example, most of the arms fail to be reconstructed.

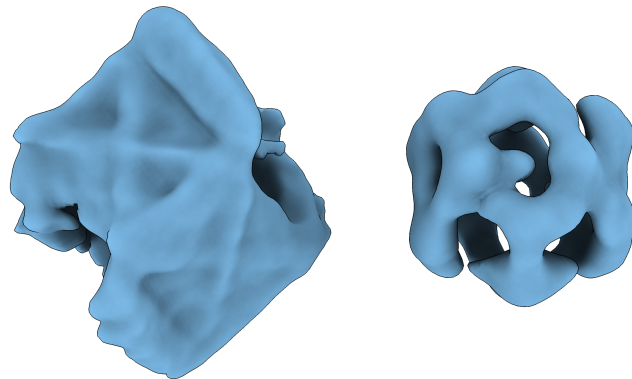

*Figure 10.* Top reconstructions generated by EMAN for the box and capsid datasets.

**B.5. ASPIRE**

In the experiments section, the FSC curves were computed using ASPIRE's `.fsc()` function from the `aspire.volume.Volume` class. We generated the reconstruction of the ribosome dataset using the code provided in Code Listing 4.

*Code 4. Reconstruct Ribosome with ASPIRE.*

```
886 import numpy as np
887 import mrcfile
888 import matplotlib.pyplot as plt
889 from aspire.source.image import ArrayImageSource
890 from aspire.abinitio import CLSyncVoting
891 from aspire.source import OrientedSource
892 from aspire.reconstruction import MeanEstimator
893
894 mrcs_path = "data/ribosome.mrcs"
895
896 with mrcfile.open(mrcs_path, permissive=True) as mrc:
897     averages = mrc.data.copy()
898
899     averages_normed = averages - averages.mean()
900     averages_normed /= averages_normed.std()
901
902     imgs_src = ArrayImageSource(averages_normed[:])
903     imgs_src_down = imgs_src.downsample(32)
904     orient_est = CLSyncVoting(imgs_src_down, n_theta=360)
905     oriented_src = OrientedSource(imgs_src_down, orient_est)
906     rots_est = oriented_src.rotations
907     offsets_est = oriented_src.offsets
908     estimator = MeanEstimator(oriented_src)
909     estimator.maxiter = 200
910     estimated_volume = estimator.estimate()
911     estimated_volume.save('ribosome_recon_aspire.mrc')
```

909  
910  
911  
912  
913  
914  
915  
916  
917  
918  
919  
920  
921  
922  
923  
924  
925  
926  
927  
928  
929  
930  
931  
932  
933  
934
